# Supplementary material
Source: publisher figshare collection journal article supplement (https://tandf.figshare.com/ndownloader/files/12856772)
Supplement: Supplementary file 1 [file 12856772]

| **Patient Number** | **AJCC 7th Edition Stage** | **Description of clinical target volumes and doses** | **No. of fractions** |
| --- | --- | --- | --- |
|  |  | **Tonsillar Carcinoma Cases** |  |
| 1 | T3N2b | *69.96 Gy* – Primary tumor and enlarged LNs in left levels II-IV  *56.1 Gy* – Bilateral neck levels II-IV not included in high dose volume  *52.8 Gy* – Bilateral low neck | 33 |
| 2 | T1N3 | *70 Gy* – Primary tumor and enlarged LNs in right levels II-IV  *56 Gy* – Remainder of right neck and left neck | 35 |
| 3 | T3N2c | *70 Gy* – Primary tumor and enlarged LNs including right levels II-IV and retrostyloid space, left level II  *56 Gy* – Bilateral neck outside of boost region | 35 |
| 4 | T3N2b | *70 Gy* – Primary tumor and enlarged LNs in right levels II-III  *56 Gy* – Bilateral neck outside of boost region | 35 |
| 5 | T3N2b | *70 Gy* – Primary tumor and enlarged LNs in right levels II-III  *56 Gy* – Right neck outside of boost region  *52.5* Gy – Left neck | 35 |
| 6 | T1N2b | *70 Gy* – Primary tumor  *63 Gy* – Bilateral level II  *56 Gy* – Remainder of bilateral neck | 35 |
| 7 | T4aN2a | *70 Gy* – Primary tumor and enlarged LN right level II  *59.5 Gy* – Remainder of right levels II-III not included in boost region  *56 Gy* – Remainder of right neck and left neck | 35 |
| 8 | T1N2a | *64.5 Gy* – Primary tumor and left neck levels II-IV  52 Gy – Right neck levels II-IV | 30 |
| 9 | T4N2b | *70 Gy* – Primary tumor and enlarged LNs left levels IB-II  *56 Gy* – Remainder of left neck and right neck | 35 |
| 10 | T1N2b | *70 Gy* – Primary tumor and enlarged LNs left levels II-III and retrostyloid space  *56 Gy* – Remainder of left neck and right neck | 35 |
| 11 | T2N3 | *70 Gy* – Primary tumor and enlarged LNs throughout bilateral neck levels II-IV  *56 Gy* – Bilateral neck levels Ib-IV and retrostlyoid space outside of boost region  *52 Gy* – Low neck and upper mediastinum | 35 |
| 12 | T2N2a | *70 Gy* – Primary tumor and enlarged LN within left level II  *56 Gy* – Remainder of left levels II-III and right level III  *54 Gy* – Remainder of bilateral necks | 35 |
| 13 | T4N2b | *70 Gy* – Primary tumor and enlarged LNs within left level II  *56 Gy* – Remainder of left neck outside of boost region and right neck | 35 |
| 14 | T4N2c | *70 Gy* – Primary tumor and enlarged LNs within bilateral level II  *56 Gy* – Bilateral neck levels IB-IV not included in boost volume | 35 |
| 15 | T4N2b | *70 Gy* – Primary tumor and enlarged LNs within left level II.  *56 Gy* – Left levels IB-IV not included in boost volume and right neck | 35 |
|  |  | **Nasopharyngeal Carcinoma Cases** |  |
| 16 | T2N3a | *69.93 Gy* – Primary tumor and extensive bilateral adenopathy throughout bilateral retropharyngeal space, bilateral levels IB-III, and left level IV  *59.4 Gy* – Elective base of skull and right supraclavicular fossa | 33 |
| 17 | T2N1 | *69.96 Gy* – Primary tumor and enlarged LNs within bilateral level II  *59.4 Gy* – Elective base of skull and bilateral neck levels IB-III not included in boost volume  *54 Gy* – Bilateral low neck | 33 |
| 18 | T4N2 | *69.96 Gy* – Primary tumor and enlarged LN within left level II  *59.4 Gy* – Elective base of skull and bilateral neck not included in boost volume | 33 |
| 19 | T4N2 | *69.96 Gy* – Primary tumor and enlarged LNs within right level II and left levels II-III  *59.4 Gy* – Elective base of skull and bilateral neck all levels not included in boost volume | 33 |
| 20 | T3N2 | *69.96 Gy* – Primary tumor and bilateral enlarged level II LNs  *59.4 Gy* – Elective base of skull and bilateral neck levels IB-IV not included in boost volume  *54 Gy* – Bilateral low neck | 33 |
| 21 | T4N2 | *69.96 Gy* – Primary tumor and enlarged LNs within right level II-III and left level II  *59.4 Gy* – Elective base of skull, bilateral neck levels not included in boost volume  *54 Gy* – Bilateral low neck | 33 |
| 22 | T4N3a | *69.96 Gy* – Primary tumor and enlarged LNs within bilateral levels II-III  *59.4 Gy* – Elective base of skull, bilateral levels IB and IV  *54 Gy* – Bilateral low neck | 33 |
| 23 | T4N2 | *69.96 Gy* – Primary tumor and enlarged LNs within left level II  *59.4 Gy* – Elective base of skull and bilateral levels IB-III not included in boost volume  *54 Gy* – Bilateral low neck | 33 |
| 24 | T3N1 | *70 Gy* – Primary tumor and single enlarged LN within left level II  *56 Gy* – Elective base of skull and bilateral neck levels IB-V not included in boost volume | 35 |
| 25 | T2N1 | *69.96 Gy* – Primary tumor and single right level II enlarged LN  *56 Gy* - Elective base of skull and bilateral levels IB-III not included in boost volume  *54 Gy* – Bilateral low neck | 33 |
| 26 | T1N2 | *69.96 Gy* – Primary tumor and enlarged LNs within bilateral level II  *59.4 Gy* – Elective base of skull and bilateral levels IB-III not included in boost volume  *54 Gy* – Bilateral low neck | 33 |
| 27 | T4N1 | *70.95 Gy* – Primary tumor and enlarged retropharyngeal LN  *59.4 Gy* – Elective base of skull and bilateral levels IB-III not included in boost volume  *54 Gy* – Bilateral low neck | 33 |
| 28 | T1N1 | *69.96 Gy* – Primary tumor and enlarged LNs within right levels II-III  *59.4 Gy* – Elective base of skull and bilateral levels IB-III not included in boost volume  *54 Gy* – Bilateral low neck | 33 |
| 29 | T2N0 | *69.96 Gy* – Primary tumor  *59.4 Gy* – Elective base of skull and bilateral levels IB-III  *54 Gy* – Bilateral low neck | 33 |
| 30 | T3N1 | *69.96 Gy* – Primary tumor and enlarged LNs within right levels II-III and left level II  *59.4 Gy* – Elective base of skull and bilateral levels IB-III not included in boost volume  *54 Gy* – Bilateral low neck | 33 |
